# Supplementary material
Source: PubMed Central journal article supplement (PMC8652653)

Figure S2. Cases of ITP during the COVID pandemic

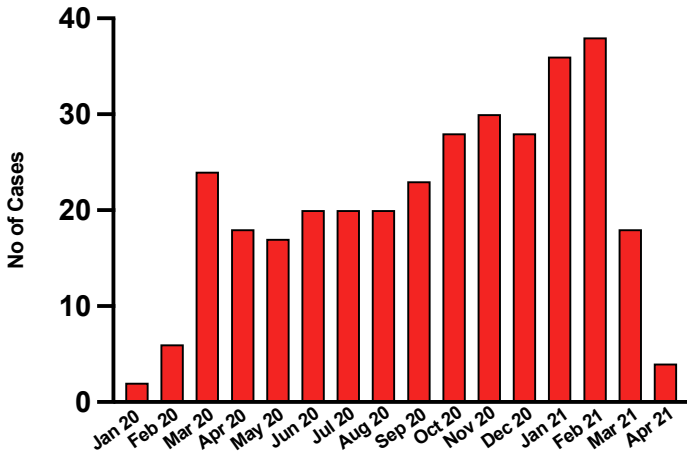

Supplement: BJH-196-351-s001.pdf [file BJH-196-351-s001.pdf]
